# Supplementary figures and images for: Receptor differential activation and cooperativity better explain cellular preference for different chemoattractant gradient shapes in an EGFR system
Source: Royal Society of Chemistry journal article supplement (doi:10.1039/c1ib00040c), 2011-01-01

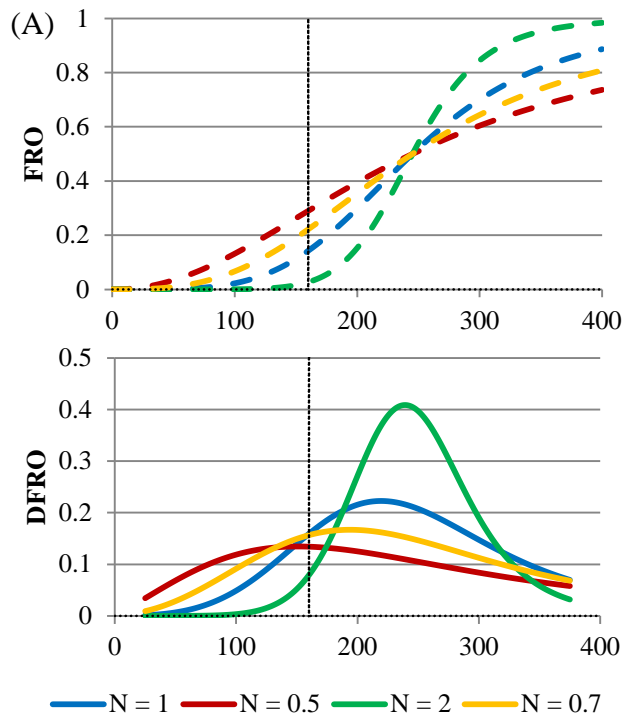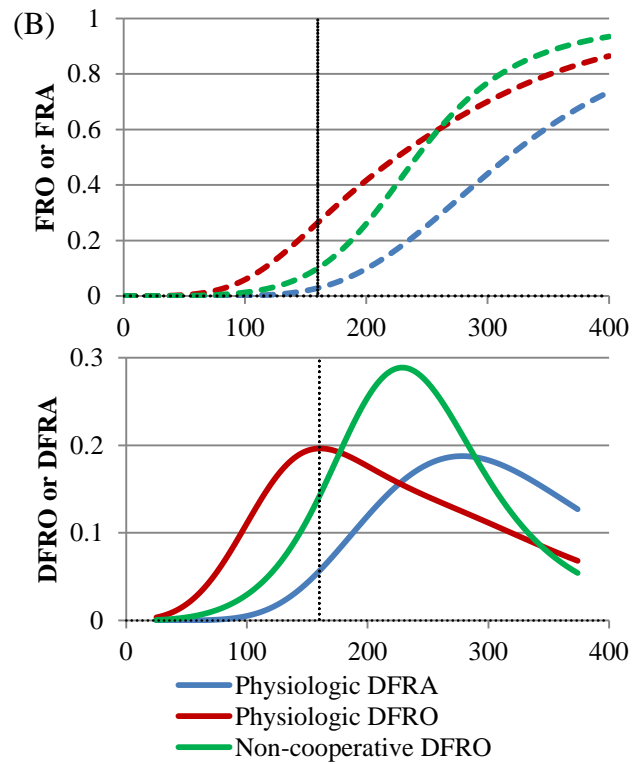

Supplement: c1ib00040c_2.pdf [file c1ib00040c_2.pdf]
